# Supplementary material
Source: publisher site journal article supplement (https://www.dovepress.com/article/114985)
Supplement: Supplementary file 1 [file get_supplementary_file.php]

## メルカゾール錠 5mg

### 【この薬は？】

販売名：メルカゾール錠 5mg (MERCAZOLE Tablet 5mg)

一般名：チアマゾール (Thiamazole)

含有量：1錠中 チアマゾール 5mg

### 患者向医薬品ガイドについて

**患者向医薬品ガイド**は、患者の皆様や家族の方などに、医療用医薬品の正しい理解と、重大な副作用の早期発見などに役立てていただくために作成したものです。

したがって、この医薬品を使用するときに特に知っていただきたいことを、医療関係者向けに作成されている添付文書を基に、わかりやすく記載しています。

医薬品の使用による重大な副作用と考えられる場合には、ただちに医師または薬剤師に相談してください。

ご不明な点などありましたら、末尾に記載の「お問い合わせ先」にお尋ねください。

さらに詳しい情報として、「医薬品医療機器情報提供ホームページ」  
<http://www.info.pmda.go.jp/> に添付文書情報が掲載されています。

### 【この薬の効果は？】

- ・この薬は、抗甲状腺剤と呼ばれるグループに属する薬です。
- ・この薬は、甲状腺に作用し、甲状腺ホルモンの合成に必要な酵素の働きを阻害し、甲状腺ホルモンの過剰分泌をおさえます。
- ・次の病気の人に処方されます。

#### 甲状腺機能亢進症

- ・この薬は、効果があらわれるのに時間がかかります。
- ・体調が良くなったと自己判断して使用をやめたり、効かないからといって量を増やしたりせず、指示どおりに飲み続けることが重要です。

### 【この薬を使う前に、確認すべきことは？】

- この薬を飲み始めてから、主に2ヵ月以内に重篤な無顆粒球症が起こり、死亡に至った例も報告されています。
- この薬を飲み始めてから2ヵ月間は、原則として2週ごとに血液検査が行われます。その後も定期的に血液検査が行われます。必ず受診日を守ってください。一度使用を中止して、再開する場合にも同様の血液検査が行われます。
- 無顆粒球症が起こると感染しやすくなり、かぜや扁桃腺炎の時と同様な「発熱」、「のどの痛み」、「全身のけん怠感（だるさ）」などがあらわれることがあります。  
このような症状に気づいたら、かぜと思ってそのままにせず、ただちに受診し

てください。

- 次の人は、この薬を使用することはできません。
  - ・過去にメルカゾール錠で過敏な反応を経験したことがある人
- 次の人は、慎重に使う必要があります。使用する前にそのことを医師または薬剤師に教えてください。
  - ・肝臓に障害のある人
  - ・白血球減少や他の血液障害のある人
- この薬には併用を注意すべき薬があります。他の薬を使用している場合や、新たに使用する場合は、必ず医師または薬剤師に相談してください。

## 【この薬の使い方は？】

### ●使用量および回数

飲む量は、あなたの症状などにあわせて、医師が決めます。

通常、飲む量および回数は、次のとおりです。

|    |                 | 初期量     |                   | 維持量        |                   |
|----|-----------------|---------|-------------------|------------|-------------------|
|    |                 | 飲む量     | 飲む回数              | 飲む量        | 飲む回数              |
| 成人 | 通常              | 1日6錠    | 1日分を<br>3～4回に分ける。 | 1日1～2<br>錠 | 1日分を1～<br>2回に分ける。 |
|    | 重症の場合           | 1日8～12錠 |                   |            |                   |
| 小児 | 5歳以上～<br>10歳未満  | 1日2～4錠  | 1日分を<br>2～4回に分ける。 |            |                   |
|    | 10歳以上～<br>15歳未満 | 1日4～6錠  |                   |            |                   |
| 妊婦 |                 | 1日3～6錠  | 1日分を<br>3～4回に分ける。 |            |                   |

初期量で症状がほぼ消失したら、薬の量を1～4週間ごとに徐々に減らして、維持量とします。

### ●どのように飲むか？

コップ1杯程度の水またはぬるま湯で飲んでください。

### ●飲み忘れた場合の対応

決して2回分を一度に飲まないでください。

気がついた時に、1回分を飲んでください。ただし、次の飲む時間が近い場合は1回とばして、次の時間に1回分を飲んでください。

### ●多く使用した時（過量使用時）の対応

甲状腺腫（甲状腺のはれ）や甲状腺機能低下（からだのだるい、動作やしゃべり方が遅い、むくみ、寒がりになる）があらわれる可能性があります。いくつかの症状が同じような時期にあらわれたら、すぐに医師または薬剤師に連絡してください。

## 【この薬の使用中に気をつけなければならないことは？】

- ・この薬を飲み始めてから2ヵ月間は、原則として2週ごとに血液検査が行われます。その後も定期的に血液検査が行われます。必ず受診日を守ってください。
- ・妊婦または妊娠している可能性がある人、授乳中の人は医師に相談してください。

- ・妊娠中は2週間ごとに甲状腺機能の検査が行われます。
- ・他の医師を受診する場合や、薬局などで他の薬を購入する場合は、必ずこの薬を飲んでいいることを医師または薬剤師に伝えてください。

## 副作用は？

特にご注意ください重大な副作用と、それぞれの主な自覚症状を記載しました。副作用であれば、それぞれの重大な副作用ごとに記載した主な自覚症状のうち、いくつかの症状が同じような時期にあらわれることが一般的です。このような場合には、ただちに医師または薬剤師に相談してください。

| 重大な副作用                                                                                 | 主な自覚症状                                                  |
|----------------------------------------------------------------------------------------|---------------------------------------------------------|
| 汎血球減少<br>はんけつきゅうげんしょう                                                                  | めまい、動悸（どうき）、耳鳴り、鼻血、出血しやすい、歯ぐきの出血、あおあざができる、息切れ           |
| 再生不良性貧血<br>さいせいふりょうせいひんけつ                                                              | 階段や坂を上る時の動悸や息切れ、鼻血、動悸、息切れ、あおあざができる、めまい、歯ぐきの出血、出血が止まりにくい |
| 無顆粒球症<br>むかりゅうきゅうしょう                                                                   | 発熱、のどの痛み、からだがだるい                                        |
| 白血球減少<br>はっけつきゅうげんしょう                                                                  | 発熱、のどの痛み、からだがだるい                                        |
| 低プロトロンビン血症<br>ていプロトロンビンけっしょう                                                           | 出血しやすい、あおあざができる、出血が止まりにくい、歯ぐきの出血、鼻血                     |
| 第Ⅶ因子欠乏症<br>だいなないんしけつぼうしょう                                                              | 出血が止まりにくい、出血しやすい、あおあざができる                               |
| 血小板減少<br>けっしょうばんげんしょう                                                                  | 歯ぐきの出血、皮下出血、鼻血、出血が止まりにくい、あおあざができる                       |
| 血小板減少性紫斑病<br>けっしょうばんげんしょうせいしはんびょう                                                      | 歯ぐきの出血、皮下出血、鼻血                                          |
| 肝機能障害<br>かんきのうしょうがい                                                                    | 皮膚や白目が黄色くなる、尿の色が濃くなる、嘔吐（おうと）、吐き気、食欲不振、かゆみ、からだがだるい       |
| 黄疸<br>おうだん                                                                             | 皮膚や白目が黄色くなる、尿が褐色になる                                     |
| 多発性関節炎                                                                                 | 関節の痛み、関節のはれ                                             |
| SLE様症状<br>エスエルイーようしょうじょう                                                               | 顔に蝶型の赤い斑点、発熱、筋肉の痛み、関節の痛み、リンパ節のはれ、からだがだるい、上腹部の痛み         |
| インスリン自己免疫症候群<br>インスリンじこめんえきしょうこうぐん                                                     | 冷や汗、空腹感、動悸、頭痛、手足のふるえ、ふらつき、めまい、脱力感                       |
| 間質性肺炎<br>かんしつせいはいえん                                                                    | 息苦しい、息切れ、発熱、から咳                                         |
| 抗好中球細胞質抗体（ANCA）<br>関連血管炎症候群<br>こうこうちゅうきゅうさいぼうしつこうたい<br>（エイエヌシーエイ）かんれんけつかんえん<br>しょうこうぐん | 発熱、関節の痛み、息苦しい、皮疹、皮下出血、頭痛、しびれや麻痺、血尿、貧血                   |

|                         |                                   |
|-------------------------|-----------------------------------|
| 横紋筋融解症<br>おうもんきんゆうかいしょう | 手足のこわばり、手足のしびれ、脱力感、<br>筋肉の痛み、赤褐色尿 |
|-------------------------|-----------------------------------|

以上の自覚症状を、副作用のあらわれる部位別に並び替えると次のとおりです。これらの症状に気づいたら、重大な副作用ごとの表をご覧ください。

| 部位  | 自覚症状                                            |
|-----|-------------------------------------------------|
| 全身  | 発熱、関節の痛み、関節のはれ、リンパ節のはれ、からだ<br>がだるい、冷や汗、ふらつき、脱力感 |
| 頭部  | めまい、頭痛                                          |
| 顔面  | 鼻血、顔に蝶型の赤い斑点                                    |
| 眼   | 白目が黄色くなる                                        |
| 耳   | 耳鳴り                                             |
| 口や喉 | 歯ぐきの出血、のどの痛み、嘔吐、吐き気、から咳                         |
| 胸部  | 動悸、息切れ、階段や坂を上る時の動悸や息切れ、吐き気、<br>息苦しい             |
| 腹部  | 吐き気、食欲不振、上腹部の痛み、空腹感                             |
| 手・足 | 関節の痛み、関節のはれ、手足のふるえ、手足のこわばり、<br>手足のしびれ           |
| 皮膚  | あおあざができる、皮下出血、皮膚が黄色くなる、かゆみ、<br>皮疹               |
| 筋肉  | 筋肉の痛み                                           |
| 尿   | 尿の色が濃くなる、尿が褐色になる、血尿、赤褐色尿                        |
| その他 | 出血しやすい、出血が止まりにくい、しびれや麻痺、貧血                      |

## 【この薬の形は？】

|       |                                                                                              |
|-------|----------------------------------------------------------------------------------------------|
| 形状    | 円形の錠剤<br> |
| 直径    | 8.3mm                                                                                        |
| 厚さ    | 4.6mm                                                                                        |
| 重さ    | 250mg                                                                                        |
| 色     | 白色                                                                                           |
| 識別コード | メルカゾール5                                                                                      |

## 【この薬に含まれているのは？】

|      |                                                                                                                                     |
|------|-------------------------------------------------------------------------------------------------------------------------------------|
| 有効成分 | チアマゾール                                                                                                                              |
| 添加物  | 乳糖水和物、トウモロコシデンプン、タルク、ヒプロメロース、精製白糖、ゼラチン、酸化チタン、沈降炭酸カルシウム、ステアリン酸マグネシウム、アラビアゴム末、カルナウバロウ、ステアリン酸、白色セラック、ポリオキシエチレン(160)ポリオキシプロピレン(30)グリコール |

## 【その他】

### ●この薬の保管方法は？

- ・光と湿気を避け、ふたのついた容器などに入れて室温（1～30℃）で保管してください。
- ・子供の手の届かないところに保管してください。

### ●薬が残ってしまったら？

- ・絶対に他の人に渡してはいけません。
- ・余った場合は、処分の方法について薬局や医療機関に相談してください。

## 【この薬についてのお問い合わせ先は？】

- ・症状、使用方法、副作用などのより詳しい質問がある場合は、主治医や薬剤師にお尋ねください。
- ・一般的な事項に関する質問は下記へお問い合わせください。

製造販売会社：中外製薬株式会社

(<http://www.chugai-pharm.co.jp>)

医薬情報センター

電話：0120-189706

Figure S2 Revised version of the Mercazole Drug Guide for Patients in Japanese.

患者向医薬品ガイド案

初版作成年月日

最終更新年月日

## メルカゾール錠 5mg

一般名：チアマゾール (Thiamazole)

|       |                                                                                                                      |
|-------|----------------------------------------------------------------------------------------------------------------------|
| 販売名   | メルカゾール錠 5mg                                                                                                          |
| 剤形    | 白色糖衣錠                                                                                                                |
| 形状    |  <p>直径：8.3mm 厚さ：4.6mm 重さ：250mg</p> |
| 識別コード | メルカゾール5                                                                                                              |

### 目次

1. **どんな薬？**……………p2
  - ・何の治療に使う薬？
  - ・この薬の効果は？
2. **この薬について特に重要なこと**……………p2
3. **この薬を使う前に注意すること**……………p2
  - ・使用できない人,慎重に使用する必要がある人
  - ・使用前に行われる検査
4. **この薬を使うにあたり注意すること**……………p3
  - ・他の薬と一緒に使用する場合
  - ・使用中に行われる検査
  - ・高齢者
  - ・妊娠と授乳時
  - ・子供
5. **この薬の使い方**……………p3
  - ・自動車運転や機械の操作時
  - ・食べ物と飲み物について
  - ・添加物に関する情報
6. **副作用**……………p4
7. **その他**……………p5
  - ・使用量、回数、使用の仕方
  - ・飲み忘れた場合
  - ・多く飲み過ぎた場合
  - ・保管方法
  - ・この薬に含まれる成分
  - ・製造・販売会社

## 1.どんな薬？

### ○何の治療に使う薬？

メルカゾールは、甲状腺機能亢進症(例：バセドウ病)の治療に使う薬です。バセドウ病は自己免疫疾患のひとつで、甲状腺を刺激する抗体が原因で甲状腺ホルモンが過剰に作られる病気です。甲状腺ホルモンはからだの新陳代謝を促しますが、多すぎると心臓や肝臓などのいろいろな臓器に負担がかかり、頻脈や高血糖の原因にもなります。また骨のカルシウム量が減って骨粗鬆症になります。

### ○この薬の効果は？

- ・この薬は、甲状腺に作用し、甲状腺ホルモンの合成に必要な酵素の働きを抑え、甲状腺ホルモンの過剰分泌をおさえます。
- ・この薬は、効果があらわれるのに個人差があり2～4週間かかります。
- ・体調が良くなったと自己判断して使用をやめたり、効かないからといって量を増やしたりしないで下さい。

## 2.この薬について特に重要なこと

**次のことについて、医師、薬剤師から説明を受け、十分理解した上で使用して下さい。**

- ・この薬を飲み始めてから、主に2ヵ月以内に重篤な無顆粒球症(発熱・のどの痛み・全身のだるさ等)が起こることがあります。悪化する恐れがあるので、このような症状に気づいたら風邪だと思ってそのままにせず、ただちに受診して下さい。
- ・この薬を飲み始めると血液検査が行われます。最初の2ヵ月間、原則として2週間ごとに行われ、その後も定期的に血液検査が続きます。受診日を必ず守って下さい。一度使用を中止して再開する場合にも、同様の血液検査が行われます。
- ・副作用に気がついた時以外でご自分の判断で薬の服薬を中止すると、再び症状が現れたり、服薬を再開したときに副作用が起こったりすることがあります。必ず医師の指示を守って下さい。

## 3.この薬を使う前に注意すべきこと

**次の人は使い始める前に必ず医師または薬剤師に伝えて（相談して）下さい。**

### ○次の人は、この薬を使用することはできません。

- ・過去にメルカゾール錠で過敏な反応を経験したことがある人

### ○次の人は、慎重に使う必要があります。使用する前にそのことを医師または薬剤師に告げて下さい。

- ・肝臓に障害のある人
- ・白血球減少や他の血液障害のある人

### ○この薬には併用を注意すべき薬があります。他の薬を使用している場合や、新たに使用する場合は、必ず医師または薬剤師に相談して下さい。

### ○使用前に行われる検査

- 使用前の検査はありません。

#### 4. この薬を使うにあたり注意すべきこと

##### ○他の薬と一緒に使用する場合

以下の薬を使用しているまたは新たに使用する人は注意が必要です。必ず医師または薬剤師に相談して下さい。  
一緒に使用するには注意が必要です。

- ・血栓症の薬であるワルファリンカリウム：ワルファリンカリウムの効果が弱く出る場合があります。
- ・心不全の薬であるジゴキシンなど【ジギタリス製剤】：ジギタリス製剤の作用が強くてたり、弱くてたりする場合があります。

##### ○使用中に行われる検査

この薬を飲み始めてから 2 ヶ月間は、原則として 2 週ごとに血液検査が行われます。その後も定期的に血液検査が行われます。必ず受診日を守って下さい。一度使用を中止して、再開する場合にも同様の血液検査が行われます。

##### ○高齢者

特に注意する情報はありません。

##### ○妊娠と授乳時の注意

- ・妊婦または妊娠している可能性がある人、授乳中の人は医師に相談して下さい。
- ・母乳に影響を与えることがあるので、授乳は避けて下さい。
- ・妊娠中は 2 週間ごとに甲状腺機能の検査が行われます。

##### ○子供

特に注意する情報はありません。

##### ○自動車運転や機械の操作時

特に注意する情報はありません。

##### ○食べ物と飲み物についての注意

特に注意する情報はありません。

##### ○添加物に関する情報

特に注意する情報はありません。



## 5.この薬の使い方

### 使用量、回数、使用の仕方

・症状に合わせて医師が服用量を指示しますので、指示された用量を守って服用して下さい。

**初期量**は、飲み始めてから症状がほぼなくなるまでの期間に飲む量です。

**維持量**は、症状がほぼなくなってから飲む薬の量です。初期量でほぼ症状がなくなったら医師の指示で薬の量を1～4週間ごとに徐々に減らしていき、維持量とします。

### 成人(15歳以上の場合)

| 初期量  |            | 維持量        |
|------|------------|------------|
| 飲む回数 | 1日3～4回に分ける | 1日1～2回に分ける |
| 飲む量  | 通常         | 1日1～2錠     |
|      | 重症時        |            |

### 小児(15歳以下の場合)

| 初期量  |            | 維持量    |        |
|------|------------|--------|--------|
| 飲む回数 | 1日2～4回に分ける | 1日1～2錠 |        |
| 飲む量  | 5歳以上10歳未満  |        | 1日2～4錠 |
|      | 10歳以上15歳未満 |        | 1日4～6錠 |

### 妊婦

| 初期量  |            | 維持量        |
|------|------------|------------|
| 飲む回数 | 1日3～4回に分ける | 1日1～2回に分ける |
| 飲む量  | 1日3～6錠     | 1日1～2錠     |

### ○飲み忘れた場合

- ・気がついた時に、すぐに1回分を飲んでください。決して2回分を一度に飲まないで下さい。
- ・ただし、次に飲む時間が近い場合は、1回飛ばして次の時間に1回分を飲んで下さい。

### ○多く飲み過ぎた場合

- ・主治医または近くの病院に直ちに連絡して、何錠飲んだか伝えて下さい。
- ・多く報告されている症状は甲状腺腫(甲状腺のはれ)や、甲状腺機能低下(からだがだるい、動作やししゃべり方が遅い、むくみ、寒がりになる)などです。このような症状があらわれたら、すぐに医師または薬剤師に連絡して下さい。

## 6.副作用

副作用はおきることがありますが、全ての人に起きるわけではありません。しかし、副作用がおきる場合、いくつかの症状が同じ時期にあらわれることがあります。症状があらわれた場合は、直ちに医師に相談して下さい。また、ここに記載のない副作用があらわれた場合も、医師・薬剤師に相談して下さい。

### ○重大な副作用（起きる頻度は不明）

✓ 以下の風邪に似た症状が出た場合は、服用を止め、直ちに医師または病院に連絡して下さい。

- ・発熱
- ・のどの痛み
- ・全身がだるい

✓ 以下の症状が出た場合は、服用を止め、直ちに医師または病院に連絡して下さい。

- ・歯ぐきの出血、鼻血、あおあざ、血が止まりにくい
- ・どうき、めまい
- ・白目や皮膚が黄色くなる
- ・尿が褐色になる、尿に血が混じる
- ・顔に蝶型の赤い斑点
- ・関節の痛み
- ・眼と口のまわりのはれ

### ○その他の副作用（起きる頻度は不明）

以下のような副作用が認められた場合には、医師または薬剤師にご相談下さい。

- ・発疹、皮膚の黒ずみや紅斑、脱毛
- ・吐き気、下痢、食欲不振
- ・頭痛、めまい
- ・筋肉痛、こむらがり、手足のしびれ
- ・味覚異常

## 7.その他

### ○保管方法

- ・光と湿気を避け、ふたのついた容器などに入れて室温（1～30℃）で保管して下さい。
- ・子供の手の届かないところに保管して下さい。

### ○この薬に含まれる成分

有効成分：チアマゾール

添加物：乳糖水和物、トウモロコシデンプン、タルク、ヒプロメロース、精製白糖、ゼラチン、酸化チタン、沈降炭酸カルシウム、ステアリン酸マグネシウム、アラビアゴム末、カルナウバロウ、ステアリン酸、白色セラック、ポリオキシエチレン(160)ポリオキシプロピレン(30)グリコール

### ○製造・販売会社

製造販売会社：中外製薬株式会社 (<http://www.chugai-pharm.co.jp>)

医薬情報センター 電話：0120-189706

### 患者向医薬品ガイドについて

患者向医薬品ガイドは、患者の皆様や家族の方などに、医療用医薬品の正しい理解と、重大な副作用の早期発見などに役立てていただくために作成したものです。

したがって、この医薬品を使用するときに特に知っていただきたいことを、医療関係者向けに作成されている添付文書を基に、わかりやすく記載しています。

医薬品の使用による重大な副作用と考えられる場合には、直ちに医師または薬剤師に相談して下さい。

ご不明な点などありましたら、末尾に記載の「お問い合わせ先」にお尋ね下さい。

さらに詳しい情報として、「医薬品医療機器情報提供ホームページ」

<http://www.info.pmda.go.jp/> に添付文書情報が掲載されています。

## 患者向医薬品ガイド

2013年11月更新

# ストラテラカプセル 5mg ストラテラカプセル 10mg ストラテラカプセル 25mg ストラテラカプセル 40mg

### 【この薬は？】

|                 |                                                |                                                  |                                                  |                                                  |
|-----------------|------------------------------------------------|--------------------------------------------------|--------------------------------------------------|--------------------------------------------------|
| 販売名             | ストラテラ<br>カプセル 5mg<br>Strattera                 | ストラテラ<br>カプセル 10mg<br>Strattera                  | ストラテラ<br>カプセル 25mg<br>Strattera                  | ストラテラ<br>カプセル 40mg<br>Strattera                  |
| 一般名             | アトモキシセチン塩酸塩<br>Atomoxetine Hydrochloride       |                                                  |                                                  |                                                  |
| 含有量<br>(1カプセル中) | アトモキシセチン<br>塩酸塩 5.71mg<br>(アトモキシセチ<br>ンとして5mg) | アトモキシセチン<br>塩酸塩 11.43mg<br>(アトモキシセチ<br>ンとして10mg) | アトモキシセチン<br>塩酸塩 28.57mg<br>(アトモキシセチ<br>ンとして25mg) | アトモキシセチン<br>塩酸塩 45.71mg<br>(アトモキシセチ<br>ンとして40mg) |

### 患者向医薬品ガイドについて

**患者向医薬品ガイド**は、患者の皆様や家族の方などに、医療用医薬品の正しい理解と、重大な副作用の早期発見などに役立てていただくために作成したものです。

したがって、この医薬品を使用するときに特に知っていただきたいことを、医療関係者向けに作成されている添付文書を基に、わかりやすく記載しています。

医薬品の使用による重大な副作用と考えられる場合には、ただちに医師または薬剤師に相談してください。

ご不明な点などありましたら、末尾に記載の「お問い合わせ先」にお尋ねください。

さらに詳しい情報として、「医薬品医療機器情報提供ホームページ」  
<http://www.info.pmda.go.jp/> に添付文書情報が掲載されています。

## 【この薬の効果は？】

- ・この薬は、注意欠陥／多動性障害（AD／HD）治療剤と呼ばれるグループに属する薬です。
- ・この薬は、脳内の神経伝達物質の働きを調節する作用により、注意欠陥／多動性障害（AD／HD）の症状を改善します。
- ・次の病気の人に処方されます。

### 注意欠陥／多動性障害（AD／HD）

- ・6歳未満の幼児における有効性および安全性は確かめられていません。
- ・この薬は、体調がよくなったと自己判断して使用を中止したり、量を加減したりすると病気が悪化することがあります。医師の指示どおりに飲み続けることが重要です。

## 【この薬を使う前に、確認すべきことは？】

- 次の人は、この薬を使用することはできません。
  - ・過去にストラテラカプセルに含まれる成分で過敏な反応を経験したことがある人
  - ・モノアミンオキシダーゼ（MAO）阻害剤を飲んでいる、または飲むのをやめてから2週間以内の人
  - ・心血管に重篤な障害のある人
  - ・褐色細胞腫の人、または過去に褐色細胞腫であった人
  - ・閉塞隅角緑内障（へいそくぐうかくりょくないしょう）（急激な目の痛み、頭痛、吐き気、物体がぼやけて見える）のある人
- 次の人は、慎重に使う必要があります。使い始める前に医師または薬剤師に告げてください。
  - ・肝臓に障害のある人
  - ・腎臓に障害のある人
  - ・けいれん発作のある人、または過去にけいれん発作をおこしたことがある人
  - ・心臓に障害のある人、または過去に心臓に障害があった人
  - ・先天性QT延長症候群のある人、または血縁にQT延長のある人
  - ・高血圧の人、または過去に高血圧であった人
  - ・脳血管障害のある人、または過去に脳血管障害をおこしたことがある人
  - ・過去に起立性低血圧をおこしたことがある人
  - ・精神病性障害、双極性障害の精神系疾患のある人
  - ・排尿困難のある人
- この薬には併用してはいけない薬[モノアミンオキシダーゼ（MAO）阻害剤 セレギリン塩酸塩（エフピー）] や、併用を注意すべき薬があります。他の薬を使用している場合や、新たに使用する場合は、必ず医師または薬剤師に相談してください。
- 心血管系に対する影響を観察するために、この薬を使用する前に血圧および心拍数（脈拍数）の測定が行われます。

○患者さんまたは家族の方に心臓の障害がある場合は、この薬を使用する前に心電図などの検査が行われます。

## 【この薬の使い方は？】

### ●使用量および回数

通常、飲む量および回数は、次のとおりです。

飲む量は、症状などにあわせて医師が決めます。

- ・特に肝障害のある人では、慎重に飲む量が決められます。

[18歳未満の場合]

|      |                              |                                                    |                                                                                   |
|------|------------------------------|----------------------------------------------------|-----------------------------------------------------------------------------------|
| 販売名  | ストラテラカプセル 5mg・10mg・25mg・40mg |                                                    |                                                                                   |
| 飲む回数 | 1日2回                         |                                                    |                                                                                   |
| 1日量  | 開始量                          | その後                                                | 維持量                                                                               |
|      | 体重 1kg あたり<br>0.5mg          | 体重 1kg あたり 0.8mg ま<br>で、次に体重 1kg あたり<br>1.2mg まで増量 | ・体重 1kg あたり 1.2mg～<br>1.8mg<br>・なお、1日量として 120mg<br>か体重 1kg あたり 1.8mg<br>のいずれか少ない量 |

- ・増量するときは1週間以上かけて増量されます。

[18歳以上の場合]

|      |                              |           |            |
|------|------------------------------|-----------|------------|
| 販売名  | ストラテラカプセル 5mg・10mg・25mg・40mg |           |            |
| 飲む回数 | 1日1回または1日2回                  |           |            |
| 1日量  | 開始量                          | その後       | 維持量        |
|      | 40mg                         | 80mg まで増量 | 80mg～120mg |

- ・1日 80mg まで増量するときは1週間以上、その後の増量は2週間以上かけて増量されます。

### ●どのように飲むか？

- ・コップ1杯程度の水またはぬるま湯で飲んでください。
- ・カプセルを開けたりせずに、そのまま飲んでください。カプセルの内容物は目への刺激性があります。目に入ったときには、すぐに洗って医師に相談してください。また、手についた場合は、手を洗ってください。

### ●飲み忘れた場合の対応

決して2回分を一度に飲まないでください。

気がついた時に、1回分を飲んでください。ただし、次の飲む時間が近い場合は1回とばして、次の時間に1回分を飲んでください。

### ●多く使用した時（過量使用時）の対応

けいれん、傾眠（眠気でぼんやりする）、興奮、運動亢進、異常行動（普段と違うとっぴな行動をとる）、消化器症状、散瞳（まぶしい）、頻脈（胸がドキドキする、めまい）、口渇（口・のどの渇き）、浮動性めまい（めまい、ふらつき）、振戦（手・足が震える）、血圧上昇（めまい、頭痛）などの症状があらわれる可能性があります。いくつかの症状が同じような時期にあらわれた場合は、すぐに受診してください。

## 【この薬の使用中に気をつけなければならないことは？】

- ・ 患者さん（小児の場合は患者さんや保護者またはそれに代わる方）は、この薬の治  
療における役割や副作用について、医師または薬剤師から十分に理解できるまで説明を受けてください。  
また、小児が使用する場合は保護者またはそれに代わる方も正しい使用方法を理解して、監督してください。
- ・ この薬を長期間使用する場合は、必要に応じて休薬する期間を設けるなどして、この薬の有用性の評価が行われます。
- ・ この薬を使用中の小児において、死にたいと考える事等があります。保護者またはそれに代わる方は患者さんの状態の変化について観察し、変化が見られた場合には医師に連絡してください。
- ・ AD／HDの患者さんにおいて、攻撃的になったり、敵意をもったりすることがしばしば見られますが、この薬の使用中でも攻撃性や敵意があらわれたり悪化するとの報告があります。ご家族の方は患者さんの状態の変化について観察し、変化が見られた場合には医師に連絡してください。
- ・ 幻覚などの精神病性またはそう病の症状をおこすとの報告があります。ご家族の方は患者さんの状態の変化について観察し、変化が見られた場合には医師に連絡してください。
- ・ 眠気、めまいなどをおこす可能性がありますので、自動車の運転などの危険を伴う操作を行わないようにしてください。
- ・ この薬を使用中は定期的に、血圧および心拍数（脈拍数）の測定が行われます。
- ・ 小児にこの薬を使用した場合、使用初期に体重増加の抑制や成長の遅れが報告されています。この薬の使用中にこのような症状があらわれた場合、医師の判断により減量または中止されることがあります。
- ・ 妊婦または妊娠している可能性がある人は医師に相談してください。
- ・ 授乳を避けてください。
- ・ 他の医師を受診する場合や、薬局などで他の薬を購入する場合は、必ずこの薬を飲んでいることを医師または薬剤師に伝えてください。

## 副作用は？

特にご注意ください重大な副作用と、それぞれの主な自覚症状を記載しました。副作用であれば、それぞれの重大な副作用ごとに記載した主な自覚症状のうち、いくつかの症状が同じような時期にあらわれることが一般的です。このような場合には、ただちに医師または薬剤師に相談してください。

| 重大な副作用              | 主な自覚症状                                                                      |
|---------------------|-----------------------------------------------------------------------------|
| 肝機能障害<br>かんきのうしょうがい | からだがだるい、吐き気、嘔吐、食欲不振、かゆみ                                                     |
| 黄疸<br>おうだん          | 白目が黄色くなる、皮膚が黄色くなる、尿が褐色になる                                                   |
| 肝不全<br>かんふぜん        | 吐き気、嘔吐、食欲不振、羽ばたくような手のふるえ                                                    |
| アナフィラキシー            | からだがだるい、ふらつき、意識の低下、考えがまとまらない、ほてり、眼と口唇のまわりのはれ、しゃがれ声、息苦しい、息切れ、動悸、じんましん、判断力の低下 |

以上の自覚症状を、副作用のあらわれる部位別に並び替えると次のとおりです。これらの症状に気づいたら、重大な副作用ごとの表をご覧ください。

| 部位  | 自覚症状                     |
|-----|--------------------------|
| 全身  | からだがだるい、ふらつき             |
| 頭部  | 意識の低下、考えがまとまらない、判断力の低下   |
| 顔面  | ほてり                      |
| 眼   | 白目が黄色くなる、眼と口唇のまわりのはれ     |
| 口や喉 | 吐き気、嘔吐、しゃがれ声、眼と口唇のまわりのはれ |
| 胸部  | 吐き気、息苦しい、息切れ、動悸          |
| 腹部  | 食欲不振、吐き気                 |
| 手・足 | 羽ばたくような手のふるえ             |
| 皮膚  | かゆみ、皮膚が黄色くなる、じんましん       |
| 尿   | 尿が褐色になる                  |



## 【この薬の形は？】

|       |                                                                                              |                                                                                              |                                                                                               |                                                                                                |
|-------|----------------------------------------------------------------------------------------------|----------------------------------------------------------------------------------------------|-----------------------------------------------------------------------------------------------|------------------------------------------------------------------------------------------------|
| 販売名   | ストラテラ<br>カプセル 5mg                                                                            | ストラテラ<br>カプセル 10mg                                                                           | ストラテラ<br>カプセル 25mg                                                                            | ストラテラ<br>カプセル 40mg                                                                             |
| 形状    | 3号硬カプセル<br> | 3号硬カプセル<br> | 3号硬カプセル<br> | 3号硬カプセル<br> |
| 直径    | 長径 15.8mm<br>短径 5.85mm                                                                       | 長径 15.8mm<br>短径 5.85mm                                                                       | 長径 15.8mm<br>短径 5.85mm                                                                        | 長径 15.8mm<br>短径 5.85mm                                                                         |
| 重さ    | 0.28g                                                                                        | 0.28g                                                                                        | 0.28g                                                                                         | 0.28g                                                                                          |
| 識別コード | Lilly 3226                                                                                   | Lilly 3227                                                                                   | Lilly 3228                                                                                    | Lilly 3229                                                                                     |

## 【この薬に含まれているのは？】

|      |                                      |                                   |                                        |                                        |
|------|--------------------------------------|-----------------------------------|----------------------------------------|----------------------------------------|
| 販売名  | ストラテラ<br>カプセル 5mg                    | ストラテラ<br>カプセル 10mg                | ストラテラ<br>カプセル 25mg                     | ストラテラ<br>カプセル 40mg                     |
| 有効成分 | アトモキセチン塩酸塩（アトモキセチン）                  |                                   |                                        |                                        |
| 添加物  | 部分アルファー化デンプン、ジメチルポリシロキサン（内服用）        |                                   |                                        |                                        |
|      | カプセル本体：<br>黄色 三二酸化鉄、ラウリル硫酸ナトリウム、ゼラチン | カプセル本体：<br>酸化チタン、ラウリル硫酸ナトリウム、ゼラチン | カプセル本体：<br>青色二号、酸化チタン、ラウリル硫酸ナトリウム、ゼラチン | カプセル本体：<br>青色二号、酸化チタン、ラウリル硫酸ナトリウム、ゼラチン |

## 【その他】

### ●この薬の保管方法は？

- ・直射日光と湿気を避けて室温（1～30℃）で保管してください。
- ・子供の手の届かないところに保管してください。

### ●薬が残ってしまったら？

- ・絶対に他の人に渡してはいけません。
- ・余った場合は、処分の方法について薬局や医療機関に相談してください。

## 【この薬についてのお問い合わせ先は？】

- ・症状、使用方法、副作用などのより詳しい質問がある場合は、主治医や薬剤師にお尋ねください。

- ・一般的な事項に関する質問は下記へお問い合わせください。

製造販売会社：日本イーライリリー株式会社 (<http://www.lilly.co.jp>)

日本イーライリリー医薬情報問合せ窓口

Lilly Answers (リリーアンサーズ)

電話：0120-245-970 (一般の方、患者様向け)

受付時間：8時45分～17時30分

(土、日、祝日、その他当社の休業日を除く)

Figure S4 Revised version of the Straterra Drug Guide for Patients in Japanese.

初版作成年月日

最終更新年月日

## ストラテラカプセル 5mg, 10mg, 25mg, 40mg

一般名：アトモキセチン塩酸塩 (Atomoxetine)

| 販売名   | ストラテラカプセル5mg                                                                      | ストラテラカプセル10mg                                                                     | ストラテラカプセル25mg                                                                      | ストラテラカプセル40mg                                                                       |
|-------|-----------------------------------------------------------------------------------|-----------------------------------------------------------------------------------|------------------------------------------------------------------------------------|-------------------------------------------------------------------------------------|
| 形状    |  |  |  |  |
| 識別コード | Lilly 3226                                                                        | Lilly 3227                                                                        | Lilly 3228                                                                         | Lilly 3229                                                                          |

### 目次

1. **どんな薬？**……………p2
  - ・何の治療に使う薬？
  - ・この薬の効果は？
2. **この薬について特に重要なこと**……………p2
3. **この薬を使う前に注意すること**……………p2
  - ・使用できない人,慎重に使用する必要がある人
  - ・使用前に行われる検査
4. **この薬を使うにあたり注意すること**……………p3
  - ・他の薬と一緒に使用する場合
  - ・使用中に行われる検査
  - ・高齢者
  - ・妊娠と授乳時
  - ・子供
  - ・自動車運転や機械の操作時
  - ・食べ物と飲み物について
  - ・添加物に関する情報
5. **この薬の使い方**……………p4
  - ・使用量、回数、使用の仕方
  - ・飲み忘れた場合
  - ・多く飲み過ぎた場合
6. **副作用**……………p5
7. **その他**……………p6
  - ・保管方法
  - ・この薬に含まれる成分
  - ・製造・販売会社

## 1.どんな薬？

### ○何の治療に使う薬？

ストラテラは、6歳以上の小児と青少年の注意欠陥／多動性障害（AD/HD）の治療に用いられます。ADHDは、年齢や発達に釣り合わない不注意さや多動性、衝動性を特徴とし、日常活動や学習に支障をきたす、子供に多くみられる発達障害です。

### ○この薬の効果は？

ストラテラは、脳内のノルアドレナリンの量を増加させることにより、ADHDの患者では注意力を上昇させ衝動性や過度の活動を減少させるはたらきがあります。ノルアドレナリンは脳内で自然に産生される化学物質です。この薬は、ADHDの症状を改善するために処方されました。ストラテラは、依存性は示されていません。ストラテラを服用し始めて、症状が完全に改善されるには数週間はかかるかとされています。

## 2.この薬について特に重要なこと

### 次のことについて、医師、薬剤師から説明を受け、十分理解した上で使用して下さい。

- ・子供や未成年で、自殺をしたいなどの思い、また幻覚を見たり、攻撃性や敵意を示したりすることが報告されています。服用中は注意深く観察し、そのような症状が起きた場合にはすぐに医師または薬剤師に連絡して下さい。
- ・子供で、使い始めの頃に体重の増加が抑えられたり、成長が遅れたりすることがあります。子供の成長に注意し、身長や体重の増加が思わしくないときは、医師の指示で薬を減らしたり止めることがあります。

## 3.この薬を使う前に注意すべきこと

### ○次の人は使い始める前に必ず医師または薬剤師に相談して下さい。

### ⊗ 次の人は、この薬を使用してはいけません。

- ・過去にストラテラカプセルに含まれる成分でアレルギーを経験した人
- ・パーキンソン病の治療薬セレギリン塩酸塩（販売名 エフピー錠、モノアミンオキシダーゼ（MAO）阻害剤に属する）を飲んでいて、または飲むのをやめてから2週間以内の人（ストラテラと飲み合わせると、重大な副作用または命の危険にかかわることがあります）
- ・心血管に重篤な障害がある人
- ・褐色細胞腫がある、または過去に褐色細胞腫になったことがある人
- ・閉塞隅角緑内障（急激な目の痛み、頭痛、吐き気、物体がぼやけて見える）を患っている人

### ○次の人は、慎重に使う必要があります

- ・肝臓や腎臓に病気がある人
- ・けいれん発作のある人、または起こしたことがある人

- ・心臓の病気または問題がある、またはかかったことがある人
- ・高血圧である、または高血圧であった人
- ・脳血管に障害がある、または脳血管障害にかかったことがある人
- ・低血圧で、めまいや失神を起こしやすい人
- ・精神科系の問題を抱えている人
- ・尿が出にくい人

#### ○使用前に行われる検査

- ・ストラテラを使う前と使用中に血圧や心拍数の測定を行います。
- ・本人または家族の方に心臓の病気がある場合は、使用前に心電図などの検査を行います。

### 4. この薬を使うにあたり注意すべきこと

#### ○他の薬と一緒に使用する場合

**以下の薬と一緒に使用しないで下さい。**

- ・モノアミンオキシダーゼ[（MAO）阻害剤] を飲んでいる、または飲むのをやめてから2週間以内の人：重大な副作用、または命の危険にかかわることがあります。（3. この薬を使う前に、確認すべきことを参照）

**以下の薬を使用しているまたは新たに使用する人は注意が必要です。必ず医師または薬剤師に相談して下さい。**

**一緒に使用するには注意が必要です。**

- ・ノルアドレナリンの量を変える薬（うつ病の薬のイミプラミン、ベンラファキシン、ミルタザピンや充血を減らす薬など）：薬の作用が強く現れることがあります。
- ・血圧を上げる薬（心原性ショックなどに用いるドパミン塩酸塩など）：さらに血圧が上がる場合があります。
- ・薬物代謝酵素を阻害する薬（うつ病の薬のパロキセチン等）：ストラテラの血液中の濃度が上がる場合があります。
- ・β-受容体に作用する薬（気管支ぜん息の薬のサルブタモールなど）：心血管系への作用を強める場合があります。

#### ○使用中に行われる検査

ストラテラを使う前と使用中に血圧や心拍数の測定を行います。

#### ○高齢者

高齢者（65歳以上）での安全性および有効性は調べられていません。

#### ○妊娠と授乳時

妊娠（の可能性）または妊娠の予定のある人は、医師に相談して下さい。妊娠中は使用しないで下さい。

母乳中に出てくるかどうかはわかりません。授乳は避けるかこの薬を中止して下さい。

#### ○子供

子供にこの薬を使用した場合、使用の初期に体重増加の抑制や成長の遅れが報告されています。この薬の使用中にこのような症状に気がついた場合、医師に連絡して下さい。低出生体重児、新生児、乳児、6歳未満の幼児での安全性及び有効性は調べられていません。（4. この薬を使う前に、確認すべきことを参照のこと）

#### ○自動車運転や機械の操作時

服用後、めまいや眠くなる場合がありますので、自動車の運転はやめて下さい。また危険を伴う機械操作を行わないようにして下さい。

### ○食べ物と飲み物

特に注意する情報はありません。

### ○添加物に関する情報

特に注意する情報はありません。

## 5.この薬の使い方

### ○使用量、回数、使用の方法

・症状に合わせて医師が服用量を指示しますので、指示された用量を守って服用して下さい。

#### 【18歳未満の場合】

|      |                              |                                             |
|------|------------------------------|---------------------------------------------|
| 販売名  | ストラテラカプセル 5mg・10mg・25mg・40mg |                                             |
| 飲む回数 | 1日2回                         |                                             |
| 1日量  | 開始量                          | その後                                         |
|      | 体重 1kg あたり 0.5mg             | 体重 1kg あたり 0.8mg まで、次に体重 1kg あたり 1.2mg まで増量 |

・増量するときは1週間以上かけて増量されます。

#### 【18歳以上の場合】

|      |                              |           |
|------|------------------------------|-----------|
| 販売名  | ストラテラカプセル 5mg・10mg・25mg・40mg |           |
| 飲む回数 | 1日1回または1日2回                  |           |
| 1日量  | 開始量                          | その後       |
|      | 40mg                         | 80mg まで増量 |

・1日80mg まで増量するときは1週間以上、その後の増量は2週間以上かけて増量されます。

カプセルの内容物は目への刺激性があります。目に入ったときには、すぐに洗って医師に相談して下さい。また、手や体、衣服についた場合も、洗い流して下さい。

### ○飲み忘れた場合

気がついた時に、すぐに1回分を飲んで下さい。決して2回分を一度に飲まないで下さい。ただし、次に飲む時間が近い場合は、1回飛ばして次の時間に1回分を飲んで下さい。

### ○多く飲み過ぎた場合

主治医または近くの救急病院にすぐに連絡して、何カプセル飲んだか伝えて下さい。多く報告されている症状は、けいれん、ふるえ、めまい、ふらつき、胃腸症状、口が渇く、眠気でぼんやりする、胸がドキドキする、異常な行動などです。このような症状が現れた場合は、直ちに服用を中止し、すぐに受診して下さい。

## 6.副作用

副作用は起きることがありますが、全ての人に起きるわけではありません。しかし、副作用が起きる場合、いくつかの症状が同じ時期に現れることがあります。症状が現れた場合は、直ちに医師に相談して下さい。また、ここに記載のない副作用が現れた場合も、医師・薬剤師に相談して下さい。

○**重大な副作用（起きる頻度は不明）**

以下の症状が出た場合は、服用を止め、直ちに医師または病院に連絡して下さい。「息苦しい」場合は、救急車などを利用して直ちに受診して下さい。

| 副作用         | 主な自覚症状                                                                                         |
|-------------|------------------------------------------------------------------------------------------------|
| アナフィラキシー様症状 | 全身：からだがだるい、ふらつき<br>皮膚：眼やくちびるのまわりのはれ、じんましん、<br>循環器：どつき<br>呼吸器：息苦しい、息切れ、しゃがれ声、<br>精神系：意識がもうろうとする |

以下の症状が現れた場合は、直ちに医師に連絡して下さい。

| 副作用                                                  | 主な自覚症状                                                                                         |
|------------------------------------------------------|------------------------------------------------------------------------------------------------|
| 肝臓の障害<br>[肝機能障害（かんきのうしょうがい）、<br>黄疸（おうだん）、肝不全（かんふぜん）] | 全身：からだがだるい、発熱<br>皮膚：発疹、じんましん、かゆみ、皮膚が黄色くなる<br>眼：白目が黄色くなる<br>消化器：食欲がない、吐き気、おう吐、腹痛<br>その他：尿が褐色になる |

○**その他の副作用（起きる頻度 5人以上/100人中）**

| からだの部位 | 主な自覚症状                                         |
|--------|------------------------------------------------|
| 消化器    | 吐き気、食欲がない、腹痛、おう吐、便秘、口のかわき                      |
| 精神神経系  | 頭痛、うとうとしていて睡眠に陥りやすい（意識の障害あり）、フワフワしたような感覚があるめまい |
| 循環器    | どつき                                            |
| その他    | 体重の減少                                          |

**7.その他**

○**保管方法**

- ・直射日光と湿気を避けて常温（15－30℃）で保管して下さい。
- ・子供の手の届かないところに保管して下さい。ほかの人に絶対に渡さないで下さい。
- ・余った場合はごみ箱等に捨てないで、処分の方法について薬局や医療機関に相談して下さい。

○**この薬に含まれる成分**

有効成分：アトモキセチン塩酸塩（各カプセルのmg数は、アトモキセチン塩酸塩の含有量に匹敵）

添加物：アルファー化デンブ、ジメチルポリシロキサンラウリル硫酸ナトリウム、ゼラチン、黄色三二酸化鉄（5mgカプセル）、酸化チタン（10 mgカプセル）、青色二号、酸化チタン（25mg、40 mgカプセル）

○製造・販売会社

製造販売会社：日本イーライリリー株式会社（<http://www.lilly.co.jp>）

日本イーライリリー医薬情報問合せ窓口 Lilly Answers（リリーアンサーズ）

電話：0120-245-970

**患者向医薬品ガイドについて**

患者向医薬品ガイドは、患者の皆様や家族の方などに、医療用医薬品の正しい理解と、重大な副作用の早期発見などに役立てていただくために作成したものです。

したがって、この医薬品を使用するときに特に知っていただきたいことを、医療関係者向けに作成されている添付文書を基に、わかりやすく記載しています。

医薬品の使用による重大な副作用と考えられる場合には、直ちに医師または薬剤師に相談して下さい。

ご不明な点などありましたら、末尾に記載の「お問い合わせ先」にお尋ね下さい。

さらに詳しい情報として、「医薬品医療機器情報提供ホームページ」

<http://www.info.pmda.go.jp/> に添付文書情報が掲載されています。
